# Supplementary material for: Electric Source Imaging in Presurgical Evaluation of Epilepsy: An Inter-Analyser Agreement Study
Source: MDPI journal article supplement (doi:10.3390/diagnostics12102303), 2022-09-24
Supplement: s1 [file s1]

Supplementary Table S1. Sub-lobar regions. Each source was localised in one of the following sub-lobar regions. If the result of ESI showed multiple sources or was not clear, source location was defined as “non-localizable/diffuse” (if possible, right/left descriptors were added). If the source was located on the border of a clear lesion or cavity, the location was defined as “perilesional”

| <b>Region</b>             | <b>Side</b> | <b>Sub-region</b>                                                                                             |
|---------------------------|-------------|---------------------------------------------------------------------------------------------------------------|
| frontal                   | left/right  | perisylvian-superior surface / operculum<br>lateral<br>mesial<br>polar<br>orbitofrontal                       |
| temporal                  | left/right  | mesial<br>polar<br>basal<br>lateral-anterior<br>lateral-posterior<br>perisylvian-inferior surface / opercular |
| central                   | left/right  | lateral convexity<br>mesial<br>central sulcus – anterior surface<br>central sulcus – posterior surface        |
| parietal                  | left/right  | perisylvian-superior surface / opercular<br>lateral-convexity<br>mesial                                       |
| occipital                 | left/right  | perisylvian-superior surface / opercular<br>lateral<br>mesial<br>basal                                        |
| insular                   | left/right  | na                                                                                                            |
| non-localizable / diffuse | left/right  | na                                                                                                            |
| non-localizable / diffuse | na          | na                                                                                                            |
| perilesional              | na          | na                                                                                                            |

Supplementary table legend 1. na: not applicable.
